# Supplementary material for: The Inhibitory Receptor CLEC12A Regulates PI3K-Akt Signaling to Inhibit Neutrophil Activation and Cytokine Release
Source: PubMed Central journal article supplement (PMC8256872; doi:10.3389/fimmu.2021.650808), 2021-06-21
Supplement: DataSheet_1.pdf [file DataSheet_1.pdf]

*Supplementary Material*

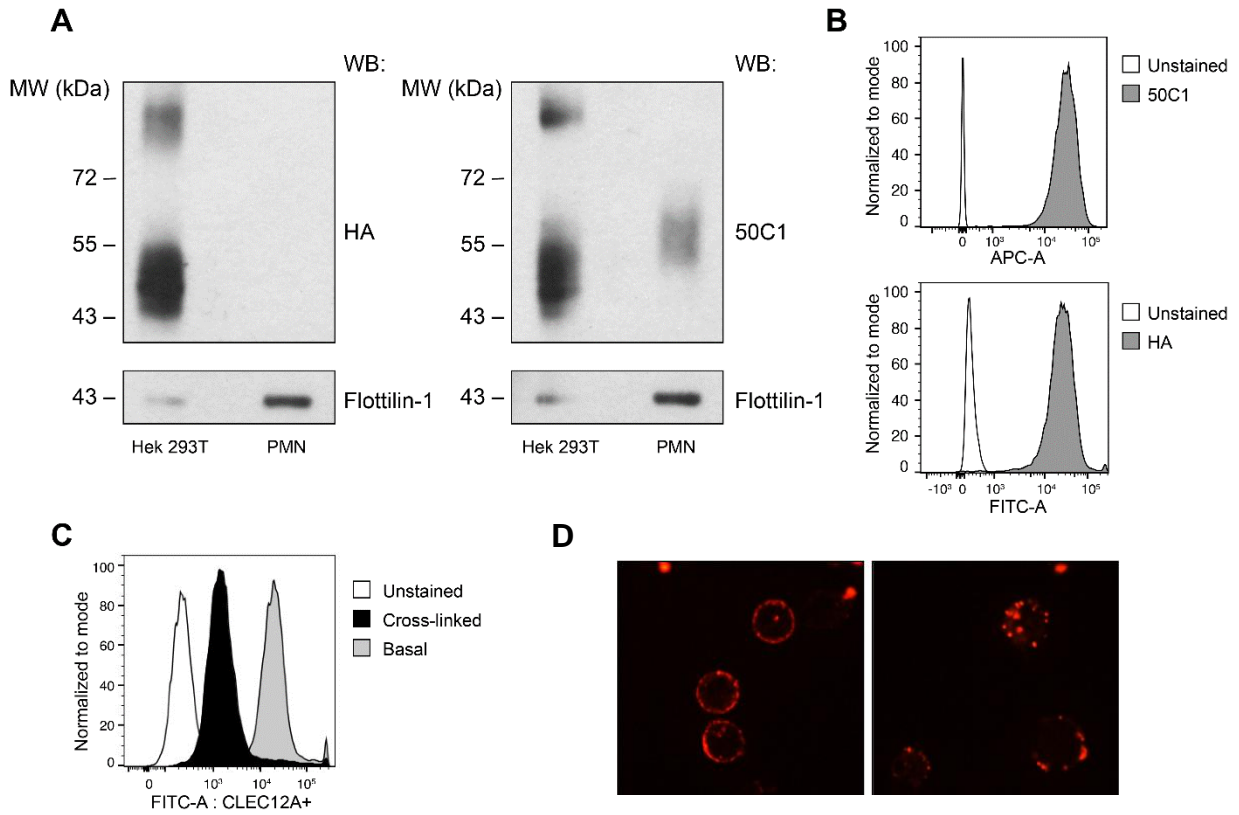

**E**

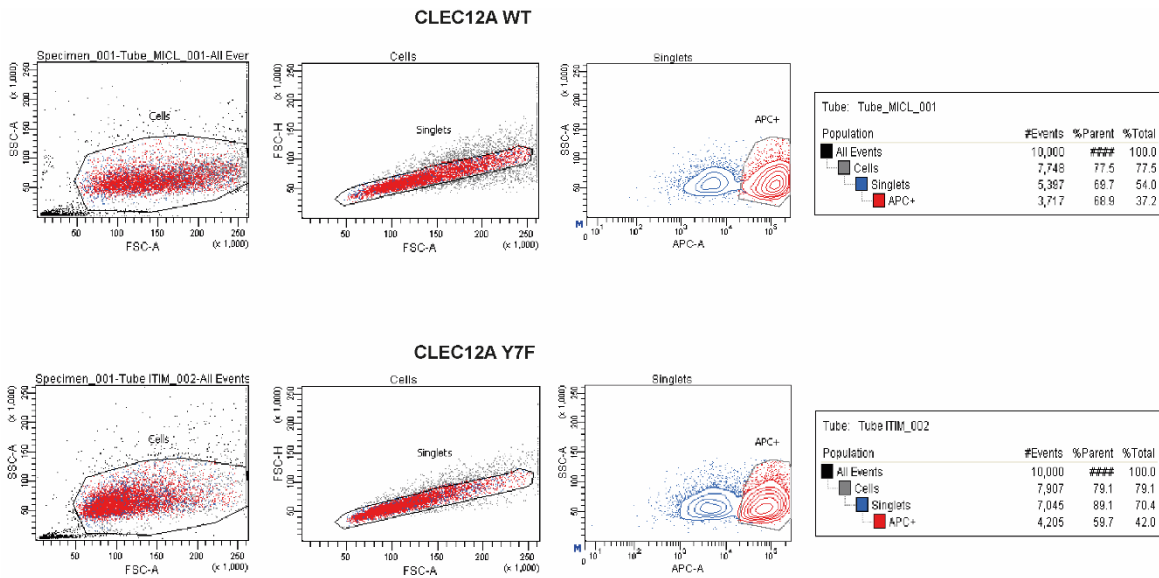

**Supplementary Figure 1. HEK-293T cells express CLEC12A-HA-wt on their surface that can be internalised by antibody-induced cross-linking as in human neutrophils.** (A) Total cell lysates were prepared from HEK-293T cells transiently transfected with CLEC12A-HA-wt or from human neutrophils isolated from healthy donors as described in *Materials and Methods* prior to immunoblotting with an anti-HA antibody or 50C1 antibodies, *left* and *right* gels, respectively. The anti-flotillin-1 antibody was used as a loading control. (B) Cell-surface expression of CLEC12Awt-HA was confirmed by flow cytometry with the same antibodies conjugated to the indicated fluorochromes. (C) The internalisation of CLEC12Awt-HA expressed on transiently transfected HEK-293T was determined by flow cytometry after cross-linking with an anti-HA and an anti-F(ab')<sub>2</sub> secondary antibody as described in *Materials and Methods*. These data are representative of 3 experiments. Similar observations were made in HeLa cells (*data not shown*). (D) The internalisation of CLEC12A in human neutrophils induced by fluorescently-labelled 50C1 after incubation at 37<sup>0</sup>C (*right image*) for 10 minutes. Cell-surface CLEC12A staining without internalisation is shown in the *left image*. Images were acquired at 63X with the Quorum WAVFX spinning disc system (Quorum Technologies, Guelph, Ontario, Canada) and images analyzed with the Volocity quantitation module as previously described in Gagné(9). (E) Gating strategy for the sorting of cells stably transfected with CLEC12A by flow cytometry using an APC-labeled CLEC12A antibody.

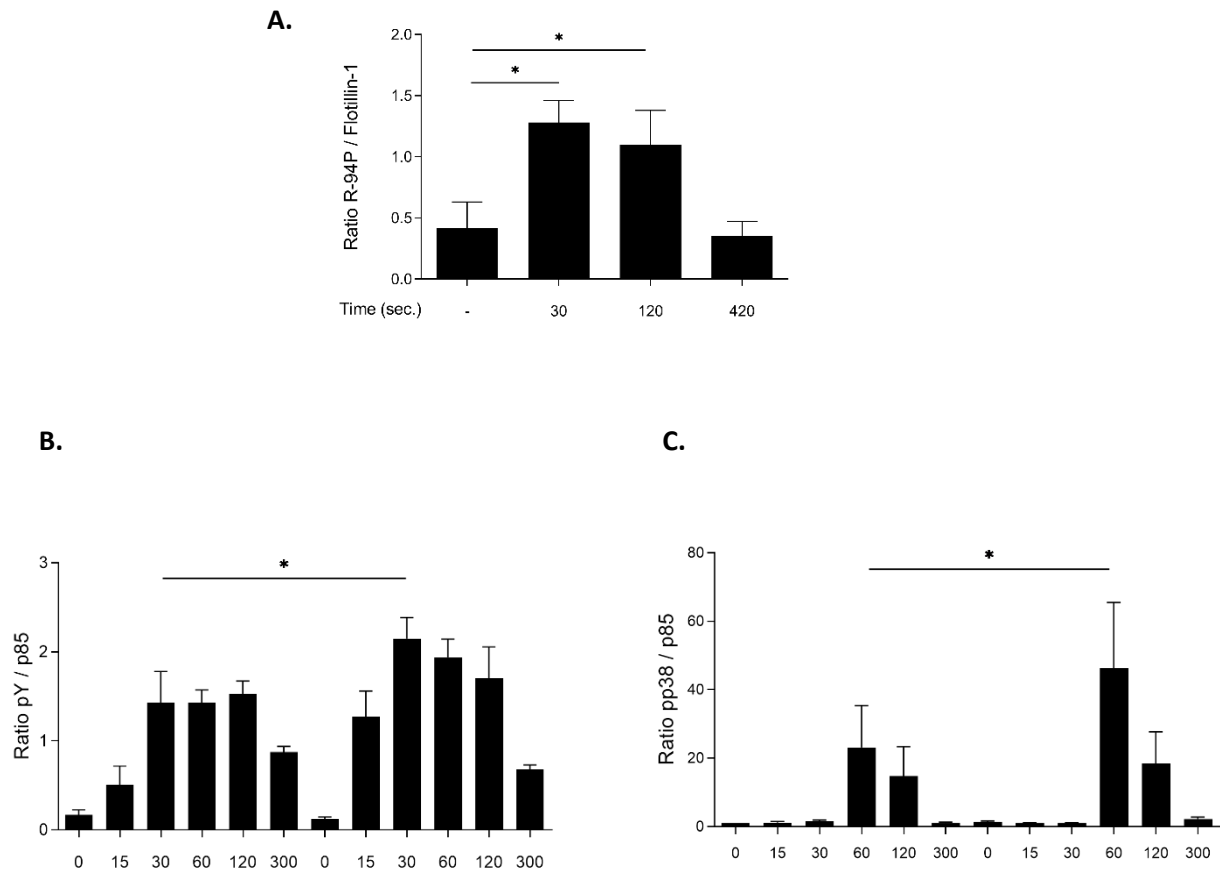

**Supplementary Figure 2.** Quantification of Western blots by densitometry- Densitometry analysis was performed with Image Lab software (Bio-Rad) on blots in Figure 4a (A) and Figure 6b ((B), *anti-tyrosine phosphorylation bands >72 kd*; (C), *p38 blot*) of the main manuscript. Statistical analysis: Two way ANOVA and the Dunnett's multiple comparisons test was performed to compare the treated cells to the control cells in (A) and the paired t-test was performed in (B) and (C). \* P <0.05.

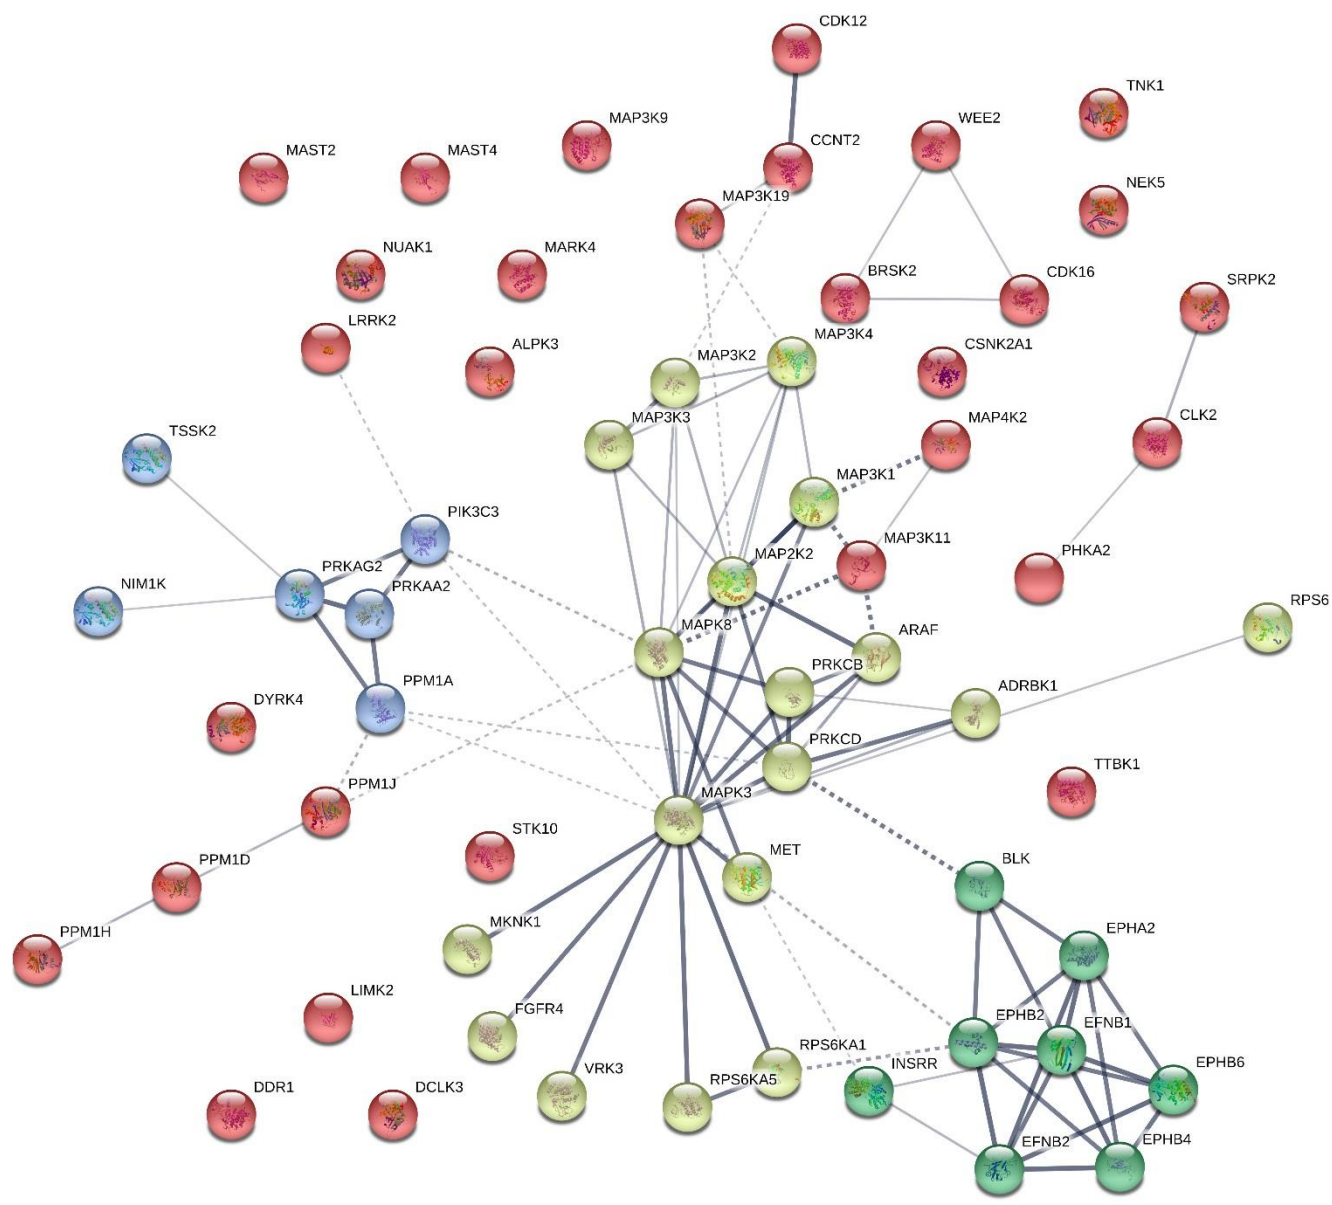

**Supplementary Figure 3. STRING analysis of proteins with increased phosphorylation after CLEC12A cross-linking compared to isotype cross-linking.**

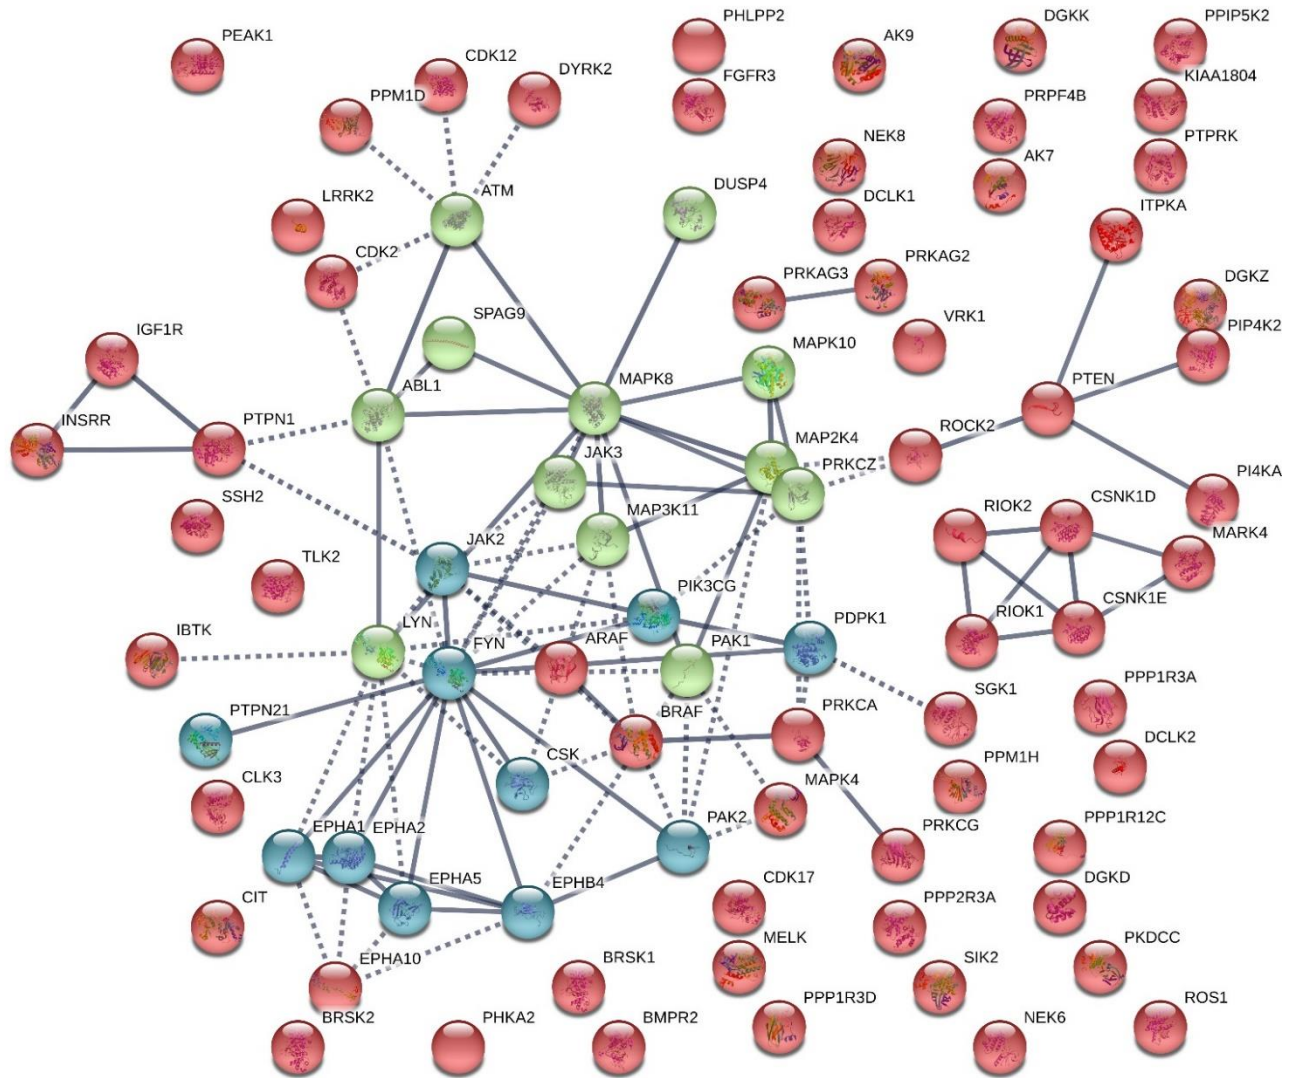

**Supplementary Figure 4. STRING analysis of kinases with increased phosphorylation in human neutrophils stimulated with TNF- $\alpha$  compared to neutrophils stimulated with TNF- $\alpha$  and cross-linked for CLEC12A cross-linking.**

**A**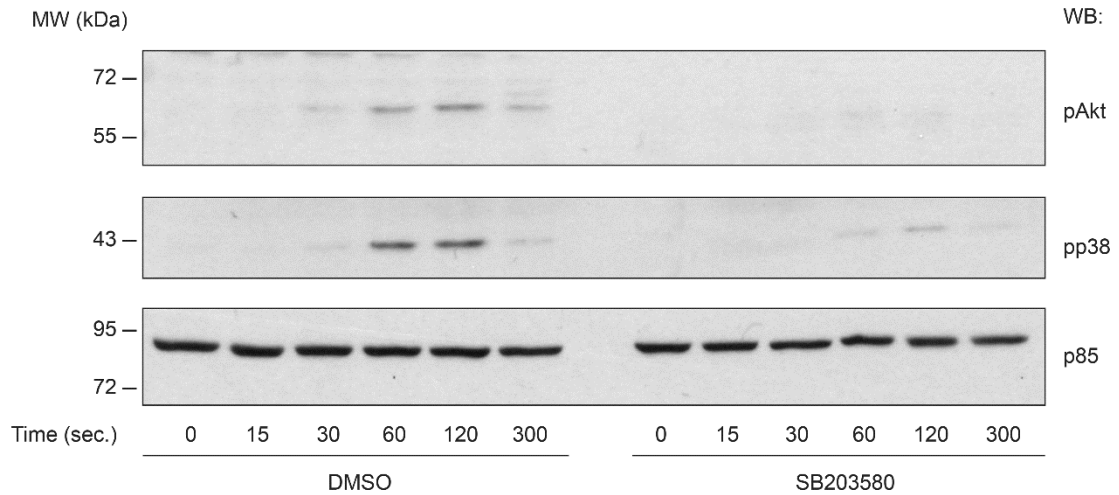**B**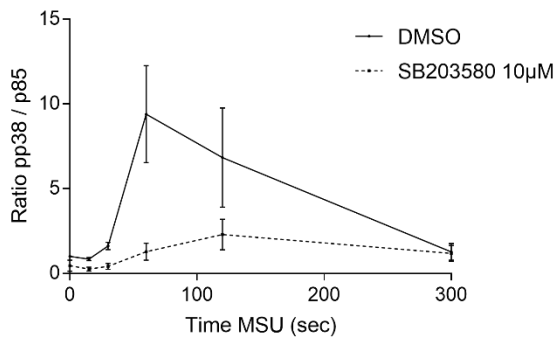**C**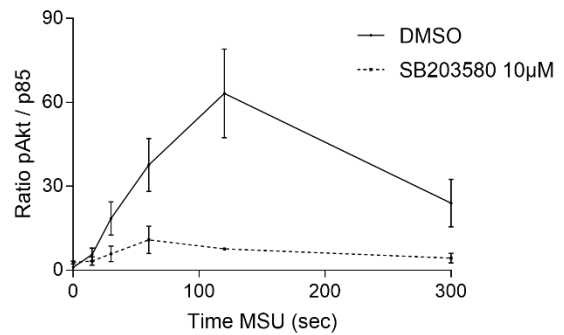

### Supplementary Figure 5. MSU induce the phosphorylation of Akt via p38 in human

**neutrophils.** (A) Neutrophils were stimulated with MSU in the presence or absence of SB203580 as described in *Materials and Methods*. Cell lysates were then immunoblotted with an anti-phospho Akt (*pAkt*) or anti-phospho-p38 (*pp38*) antibody as well as an anti-PI3K p85 subunit antibody as a loading control. (B & C) Densitometry analysis of the immunoblots in (A). These data are representative of 3 independent experiments.

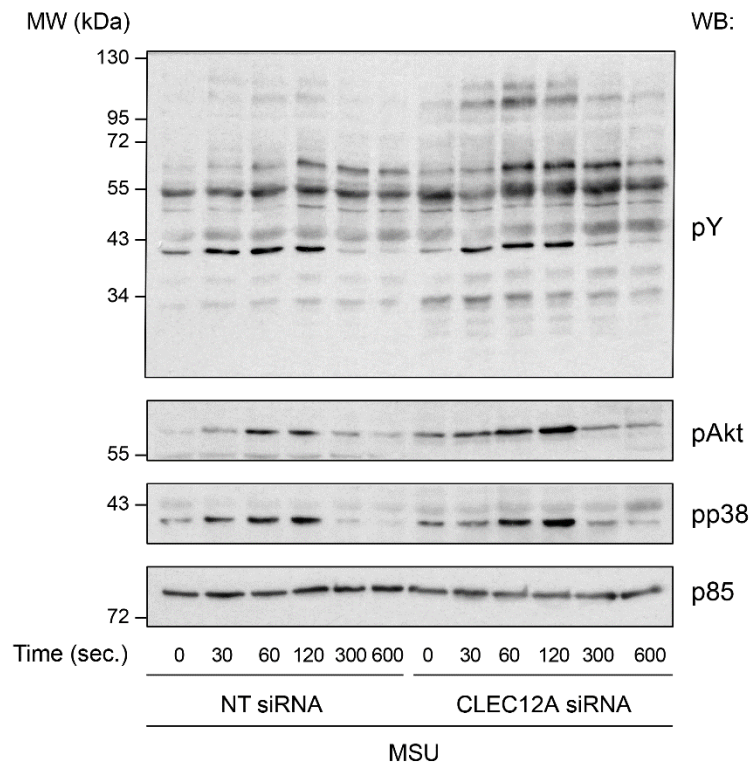

**Supplementary Figure 6. CLEC12A knock-down in THP-1 cells enhances MSU-induced global tyrosine phosphorylation and the phosphorylation of Akt and p38.** The monocytic cell line, THP-1, was cultured in RPMI supplemented with 10% heat-inactivated fetal calf or bovine serum. THP-1 cells were transfected with CLEC12A siRNA prior to stimulation with MSU as described in *Materials and Methods* followed by immunoblotting with an anti-phosphotyrosine (pY), anti-phospho Akt and a PI3K p85 subunit (loading control) antibody. These data are representative of 3 experiments.



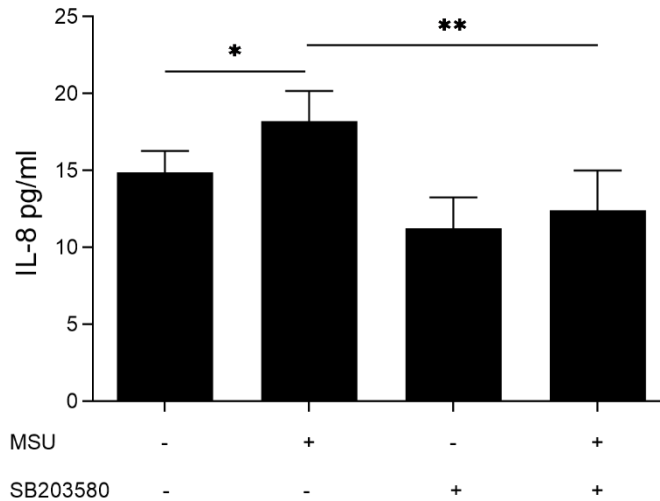

**Supplementary Figure 7. MSU-induced IL-8 production in human neutrophils is p38-**

**dependent.** Human neutrophils were stimulated with 0.3 mg/ml MSU in the presence or absence of SB203580 or diluant ((-); DMSO) and released CXCL8/IL-8 determined by ELISA. Data are representative of 3 independent experiments. Statistical analysis: Two way ANOVA and the Turkey's multiple comparisons test was performed to compare the treated cells to the control cells. \* P < 0.05, \*\* P < 0.01.

| <b>Table S1. GO molecular functions of CLEC12A-Induced Phosphoproteins</b>    |                       |                     |          |                    |     |                |              |
|-------------------------------------------------------------------------------|-----------------------|---------------------|----------|--------------------|-----|----------------|--------------|
| <b>Enrichment of phosphoproteins CLEC12A&gt;isotype GO molecular function</b> |                       |                     |          |                    |     |                |              |
|                                                                               | Homo sapiens<br>(REF) | CLEC12A-<br>induced |          |                    |     |                |              |
| GO molecular function                                                         | #                     | #                   | Expected | Fold<br>Enrichment | +/- | Raw P<br>value | FDR          |
| MAP kinase kinase<br>kinase activity                                          | 28                    | 9                   | 1.74     | 5.18               | +   | 2.18E-<br>04   | 2.90E-<br>02 |
| protein kinase activity                                                       | 614                   | 64                  | 38.13    | 1.68               | +   | 1.65E-<br>04   | 2.40E-<br>02 |
| guanyl-nucleotide<br>exchange factor activity                                 | 218                   | 30                  | 13.54    | 2.22               | +   | 1.72E-<br>04   | 2.43E-<br>02 |
| GTPase binding                                                                | 545                   | 62                  | 33.85    | 1.83               | +   | 2.10E-<br>05   | 3.75E-<br>03 |
| GTPase regulator activity                                                     | 303                   | 37                  | 18.82    | 1.97               | +   | 2.63E-<br>04   | 3.30E-<br>02 |
| phospholipid binding                                                          | 426                   | 49                  | 26.46    | 1.85               | +   | 1.45E-<br>04   | 2.26E-<br>02 |
| cell adhesion molecule<br>binding                                             | 483                   | 55                  | 30       | 1.83               | +   | 5.46E-<br>05   | 9.42E-<br>03 |
| actin binding                                                                 | 435                   | 49                  | 27.02    | 1.81               | +   | 1.76E-<br>04   | 2.41E-<br>02 |
| calcium ion binding                                                           | 715                   | 73                  | 44.41    | 1.64               | +   | 1.01E-<br>04   | 1.62E-<br>02 |

**Table S2. Protein Kinases and Phosphatases Phosphorylated upon CLEC12A Cross-linking**

| Protein                                                      | Gene    | Protein                                                  | Gene   |
|--------------------------------------------------------------|---------|----------------------------------------------------------|--------|
| Beta-adrenergic receptor kinase 1                            | ADRBK1  | Mitogen-activated protein kinase kinase kinase 2         | MAP4K2 |
| Alpha-protein kinase 3                                       | ALPK3   | Mitogen-activated protein kinase 3                       | MAPK3  |
| Serine/threonine-protein kinase A-Raf                        | ARAF    | Mitogen-activated protein kinase 8                       | MAPK8  |
| Tyrosine-protein kinase Blk                                  | BLK     | MAP/microtubule affinity-regulating kinase 4             | MARK4  |
| Serine/threonine-protein kinase BRSK2                        | BRSK2   | Microtubule-associated serine/threonine-protein kinase 2 | MAST2  |
| Cyclin-T2                                                    | CCNT2   | Microtubule-associated serine/threonine-protein kinase 4 | MAST4  |
| Cyclin-dependent kinase 12                                   | CDK12   | Hepatocyte growth factor receptor                        | MET    |
| Cyclin-dependent kinase 16                                   | CDK16   | MAP kinase-interacting serine/threonine-protein kinase 1 | MKNK1  |
| Dual-specificity protein kinase CLK2                         | CLK2    | Serine/threonine-protein kinase Nek5                     | NEK5   |
| Casein kinase II subunit alpha                               | CSNK2A1 | Serine/threonine-protein kinase NIM1                     | NIM1K  |
| Serine/threonine-protein kinase DCLK3                        | DCLK3   | AMPK-related protein kinase 5                            | NUAK1  |
| Epithelial discoidin domain-containing receptor 1            | DDR1    | Phosphorylase b kinase regulatory subunit alpha          | PHKA2  |
| Dual-specificity tyrosine-phosphorylation-regulated kinase 4 | DYRK4   | Phosphatidylinositol 3-kinase catalytic subunit type 3   | PIK3C3 |
| Ephrin-B1                                                    | EFNB1   | Protein phosphatase 1A                                   | PPM1A  |

|                                                       |         |                                                   |         |
|-------------------------------------------------------|---------|---------------------------------------------------|---------|
| Ephrin-B2                                             | EFNB2   | Protein phosphatase 1D                            | PPM1D   |
| Ephrin type-A receptor 2                              | EPHA2   | Protein phosphatase 1H                            | PPM1H   |
| Ephrin type-B receptor 2                              | EPHB2   | Protein phosphatase 1J                            | PPM1J   |
| Ephrin type-B receptor 4                              | EPHB4   | 5'-AMP-activated protein kinase subunit alpha-2   | PRKAA2  |
| Ephrin type-B receptor 6                              | EPHB6   | 5'-AMP-activated protein kinase subunit gamma-2   | PRKAG2  |
| Fibroblast growth factor receptor 4                   | FGFR4   | Protein kinase C beta                             | PRKCB   |
| Insulin receptor-related protein                      | INSRR   | Protein kinase C delta                            | PRKCD   |
| LIM domain kinase 2                                   | LIMK2   | Ribosomal protein S6 kinase alpha-1               | RPS6KA1 |
| Leucine-rich repeat serine/threonine-protein kinase 2 | LRRK2   | Ribosomal protein S6 kinase alpha-5               | RPS6KA5 |
| Mitogen-activated protein kinase kinase 2             | MAP2K2  | Ribosomal protein S6 kinase delta-1               | RPS6KC1 |
| Mitogen-activated protein kinase kinase kinase 1      | MAP3K1  | SRSF protein kinase 2                             | SRPK2   |
| Mitogen-activated protein kinase kinase kinase 11     | MAP3K11 | Serine/threonine-protein kinase 10                | STK10   |
| Mitogen-activated protein kinase kinase kinase 19     | MAP3K19 | Non-receptor tyrosine kinase TNK1                 | TNK1    |
| Mitogen-activated protein kinase kinase kinase 2      | MAP3K2  | Testis-specific serine/threonine-protein kinase 2 | TSSK2   |
| Mitogen-activated protein kinase kinase kinase 3      | MAP3K3  | Tau-tubulin kinase 1                              | TTBK1   |

|                                                  |        |                                               |      |
|--------------------------------------------------|--------|-----------------------------------------------|------|
| Mitogen-activated protein kinase kinase kinase 4 | MAP3K4 | Inactive serine/threonine-protein kinase VRK3 | VRK3 |
| Mitogen-activated protein kinase kinase kinase 9 | MAP3K9 | Wee1-like protein kinase 2                    | WEE2 |

| <b>Table S3. Molecular Functions of TNF-<math>\alpha</math> Phosphoproteins Reduced by CLEC12A Cross-linking</b> |              |              |          |                 |          |          |
|------------------------------------------------------------------------------------------------------------------|--------------|--------------|----------|-----------------|----------|----------|
|                                                                                                                  | Homo sapiens | Current List |          |                 |          |          |
| GO molecular function                                                                                            | #            | #            | Expected | Fold Enrichment | P value  | FDR      |
| microtubule motor activity                                                                                       | 86           | 18           | 5.27     | 3.41            | 2.64E-05 | 2.02E-03 |
| tau-protein kinase activity                                                                                      | 22           | 8            | 1.35     | 5.93            | 2.26E-04 | 1.42E-02 |
| protein kinase activity                                                                                          | 614          | 71           | 37.64    | 1.89            | 1.68E-06 | 1.73E-04 |
| dynein complex binding                                                                                           | 23           | 8            | 1.41     | 5.67            | 2.89E-04 | 1.66E-02 |
| dynein intermediate chain binding                                                                                | 29           | 9            | 1.78     | 5.06            | 2.47E-04 | 1.53E-02 |
| ionotropic glutamate receptor binding                                                                            | 34           | 10           | 2.08     | 4.8             | 1.63E-04 | 1.07E-02 |
| glutamate receptor binding                                                                                       | 50           | 13           | 3.06     | 4.24            | 5.24E-05 | 3.69E-03 |
| alpha-actinin binding                                                                                            | 32           | 9            | 1.96     | 4.59            | 4.54E-04 | 2.55E-02 |
| histone-lysine N-methyltransferase activity                                                                      | 44           | 10           | 2.7      | 3.71            | 9.30E-04 | 4.65E-02 |
| structural constituent of cytoskeleton                                                                           | 99           | 21           | 6.07     | 3.46            | 4.85E-06 | 4.51E-04 |
| Rac GTPase binding                                                                                               | 69           | 14           | 4.23     | 3.31            | 2.67E-04 | 1.60E-02 |
| Rho GTPase binding                                                                                               | 180          | 29           | 11.03    | 2.63            | 1.45E-05 | 1.19E-03 |
| Ras GTPase binding                                                                                               | 431          | 56           | 26.42    | 2.12            | 9.72E-07 | 1.05E-04 |
| methylated histone binding                                                                                       | 66           | 13           | 4.05     | 3.21            | 5.60E-04 | 3.03E-02 |

|                                                      |      |     |        |      |          |          |
|------------------------------------------------------|------|-----|--------|------|----------|----------|
| Rho guanyl-nucleotide exchange factor activity       | 82   | 16  | 5.03   | 3.18 | 1.49E-04 | 9.91E-03 |
| Ras guanyl-nucleotide exchange factor activity       | 140  | 23  | 8.58   | 2.68 | 6.52E-05 | 4.53E-03 |
| microtubule binding                                  | 241  | 47  | 14.77  | 3.18 | 1.03E-10 | 2.00E-08 |
| actin filament binding                               | 194  | 34  | 11.89  | 2.86 | 3.60E-07 | 4.41E-05 |
| thiol-dependent ubiquitin-specific protease activity | 107  | 17  | 6.56   | 2.59 | 7.82E-04 | 4.05E-02 |
| calmodulin binding                                   | 198  | 31  | 12.14  | 2.55 | 1.02E-05 | 8.76E-04 |
| ion channel binding                                  | 128  | 20  | 7.85   | 2.55 | 4.87E-04 | 2.70E-02 |
| protein tyrosine kinase activity                     | 136  | 20  | 8.34   | 2.4  | 7.70E-04 | 4.03E-02 |
| cadherin binding                                     | 315  | 44  | 19.31  | 2.28 | 3.02E-06 | 2.99E-04 |
| protein kinase binding                               | 658  | 78  | 40.33  | 1.93 | 2.01E-07 | 2.59E-05 |
| protein serine/threonine kinase activity             | 446  | 52  | 27.34  | 1.9  | 3.69E-05 | 2.73E-03 |
| GTPase regulator activity                            | 303  | 35  | 18.57  | 1.88 | 8.68E-04 | 4.44E-02 |
| phospholipid binding                                 | 426  | 48  | 26.11  | 1.84 | 1.96E-04 | 1.25E-02 |
| RNA binding                                          | 1661 | 152 | 101.81 | 1.49 | 2.67E-06 | 2.70E-04 |

| <b>Table S4. Protein Kinases and Phosphatases with Reduced Phosphorylation following CLEC12A Cross-linking</b> |       |                                                                        |        |
|----------------------------------------------------------------------------------------------------------------|-------|------------------------------------------------------------------------|--------|
| Protein                                                                                                        | Gene  | Protein                                                                | Gene   |
| Abelson murine leukemia viral oncogene homolog 1                                                               | ABL1  | maternal embryonic leucine zipper kinase                               | MELK   |
| Adenylate kinase 7                                                                                             | AK7   | Mitogen-activated protein kinase kinase kinase MLK4                    | MLK4   |
| Adenylate kinase 9                                                                                             | AK9   | Serine/threonine-protein kinase Nek6                                   | NEK6   |
| Serine/threonine-protein kinase A-Raf                                                                          | ARAF  | Serine/threonine-protein kinase Nek8                                   | NEK8   |
| Serine-protein kinase ATM                                                                                      | ATM   | Serine/threonine-protein kinase PAK 1                                  | PAK1   |
| Bone morphogenetic protein receptor type-2                                                                     | BMPR2 | Serine/threonine-protein kinase PAK 2                                  | PAK2   |
| Serine/threonine-protein kinase B-raf                                                                          | BRAF  | Putative 3-phosphoinositide-dependent protein kinase 1                 | PDPK1  |
| Serine/threonine-protein kinase BRSK1                                                                          | BRSK1 | Pseudopodium-enriched atypical kinase 1                                | PEAK1  |
| Serine/threonine-protein kinase BRSK2                                                                          | BRSK2 | Phosphorylase b kinase regulatory subunit alpha                        | PHKA2  |
| Cyclin-dependent kinase 12                                                                                     | CDK12 | PH domain leucine-rich repeat-containing protein phosphatase 2         | PHLPP2 |
| Cyclin-dependent kinase 17                                                                                     | CDK17 | Phosphatidylinositol 4-kinase alpha                                    | PI4KA  |
| Cyclin-dependent kinase 2                                                                                      | CDK2  | Phosphatidylinositol 4,5-bisphosphate 3-kinase catalytic subunit gamma | PIK3CG |



|                                                              |        |                                                                            |          |
|--------------------------------------------------------------|--------|----------------------------------------------------------------------------|----------|
| citron rho-interacting serine/threonine kinase               | CIT    | Phosphatidylinositol 5-phosphate 4-kinase type-2 alpha                     | PIP4K2A  |
| CDC-like kinase 3                                            | CLK3   | Protein kinase domain-containing protein, cytoplasmic                      | PKDCC    |
| Tyrosine-protein kinase CSK                                  | CSK    | Inositol hexakisphosphate and diphosphoinositol-pentakisphosphate kinase 2 | PPIP5K2  |
| Casein kinase I isoform delta                                | CSNK1D | Protein phosphatase 1D                                                     | PPM1D    |
| Casein kinase I isoform epsilon                              | CSNK1E | Protein phosphatase 1H                                                     | PPM1H    |
| Doublecortin and CaM kinase-like 1                           | DCLK1  | Protein phosphatase 1 regulatory subunit 12C                               | PPP1R12C |
| Doublecortin and CaM kinase-like 2                           | DCLK2  | Protein phosphatase 1 regulatory subunit 3A                                | PPP1R3A  |
| Diacylglycerol kinase delta                                  | DGKD   | Protein phosphatase 1 regulatory subunit 3D                                | PPP1R3D  |
| Diacylglycerol kinase kappa                                  | DGKK   | Phosphatase 2A regulatory subunit B subunit alpha                          | PPP2R3A  |
| Diacylglycerol kinase zeta                                   | DGKZ   | 5'-AMP-activated protein kinase subunit gamma-2                            | PRKAG2   |
| Dual specificity protein phosphatase 4                       | DUSP4  | 5'-AMP-activated protein kinase subunit gamma-2                            | PRKAG2   |
| Dual specificity tyrosine-phosphorylation-regulated kinase 2 | DYRK2  | 5'-AMP-activated protein kinase subunit gamma-3                            | PRKAG3   |
| Ephrin type-A receptor 1                                     | EPHA1  | 5'-AMP-activated protein kinase subunit gamma-3                            | PRKAG3   |
| Ephrin type-A receptor 1                                     | EPHA1  | Protein kinase C alpha type                                                | PRKCA    |

|                                                            |        |                                                                                                      |        |
|------------------------------------------------------------|--------|------------------------------------------------------------------------------------------------------|--------|
| Ephrin type-A receptor 10                                  | EPHA10 | Protein kinase C gamma type                                                                          | PRKCG  |
| Ephrin type-A receptor 2                                   | EPHA2  | Protein kinase C gamma type                                                                          | PRKCG  |
| Ephrin type-A receptor 5                                   | EPHA5  | Protein kinase C zeta type                                                                           | PRKCZ  |
| Ephrin type-B receptor 4                                   | EPHB4  | Putative serine/threonine-protein kinase PRKY                                                        | PRKY   |
| Fibroblast growth factor receptor                          | FGFR3  | Serine/threonine-protein kinase PRP4                                                                 | PRPF4B |
| Tyrosine-protein kinase Fyn                                | FYN    | Phosphatidylinositol 3,4,5-trisphosphate 3-phosphatase and dual-specificity protein phosphatase PTEN | PTEN   |
| Inhibitor of Bruton tyrosine kinase                        | IBTK   | Tyrosine-protein phosphatase non-receptor type                                                       | PTPN1  |
| Tyrosine-protein kinase receptor                           | IGF1R  | Tyrosine-protein phosphatase non-receptor type 21                                                    | PTPN21 |
| Insulin receptor-related protein                           | INSRR  | Receptor-type tyrosine-protein phosphatase kappa                                                     | PTPRK  |
| Inositol-trisphosphate 3-kinase A                          | ITPKA  | Serine/threonine-protein kinase RIO1                                                                 | RIOK1  |
| Tyrosine-protein kinase                                    | JAK2   | Serine/threonine-protein kinase RIO2                                                                 | RIOK2  |
| Tyrosine-protein kinase JAK3                               | JAK3   | Rho-associated protein kinase 2                                                                      | ROCK2  |
| Leucine-rich repeat serine/threonine-protein kinase 2      | LRRK2  | Tyrosine-protein kinase receptor                                                                     | ROS1   |
| LYN tyrosine kinase                                        | LYN    | Serine/threonine-protein kinase Sgk1                                                                 | SGK1   |
| Dual-specificity mitogen-activated protein kinase kinase 4 | MAP2K4 | Serine/threonine-protein kinase SIK2                                                                 | SIK2   |

|                                              |         |                                                   |       |
|----------------------------------------------|---------|---------------------------------------------------|-------|
| Mitogen-activated protein kinase kinase 11   | MAP3K11 | C-Jun-amino-terminal kinase-interacting protein 4 | SPAG9 |
| mitogen-activated protein kinase 10          | MAPK10  | Protein phosphatase Slingshot homolog 2           | SSH2  |
| Mitogen-activated protein kinase 4           | MAPK4   | Serine/threonine-protein kinase tousel-like 2     | TLK2  |
| Mitogen-activated protein kinase 8           | MAPK8   | Serine/threonine-protein kinase VRK1              | VRK1  |
| MAP/microtubule affinity-regulating kinase 4 | MARK4   |                                                   |       |
